# Supplementary material for: ROS-Responsive and pH-Sensitive Aminothiols Dual-Prodrug for Radiation Enteritis
Source: MDPI journal article supplement (doi:10.3390/antiox11112145), 2022-10-29
Supplement: s1 [file s1]

# ROS-responsive and pH-sensitive aminothiols dual-prodrug for radiation enteritis

Yuanfang Chen, Yuwei Yang, Haikang Tang, Ziqi Zhang, Xiaoliang Zhou\*, Wenqing Xu\*

1. Institute of Radiation Medicine, Chinese Academy of Medical Sciences and Peking Union Medical College, Tianjin 300192, China

\* Correspondence: zhouxiaoliang@irm-cams.ac.cn (X.Z.); xuwenqing@irm-cams.ac.cn (W.X.).

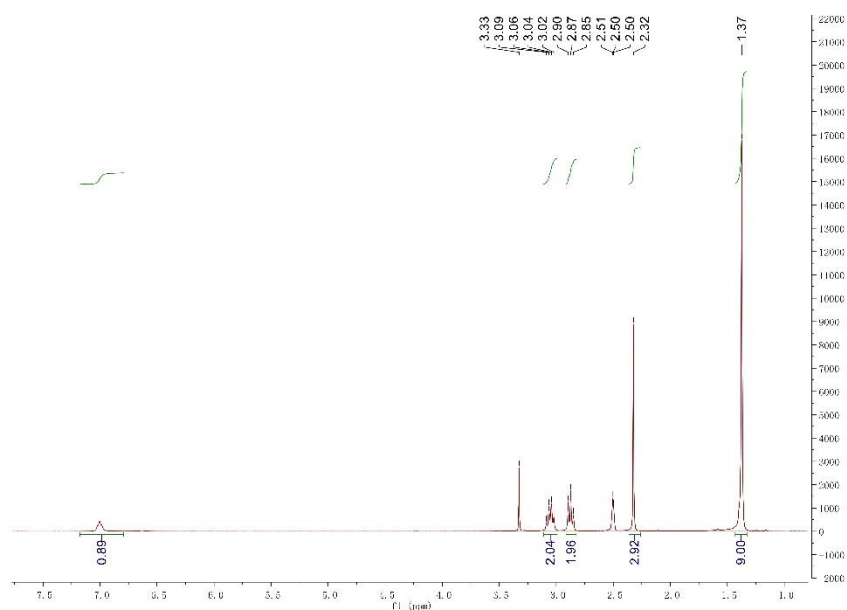

Figure S1. <sup>1</sup>H NMR spectrum of compound 3 in DMSO.

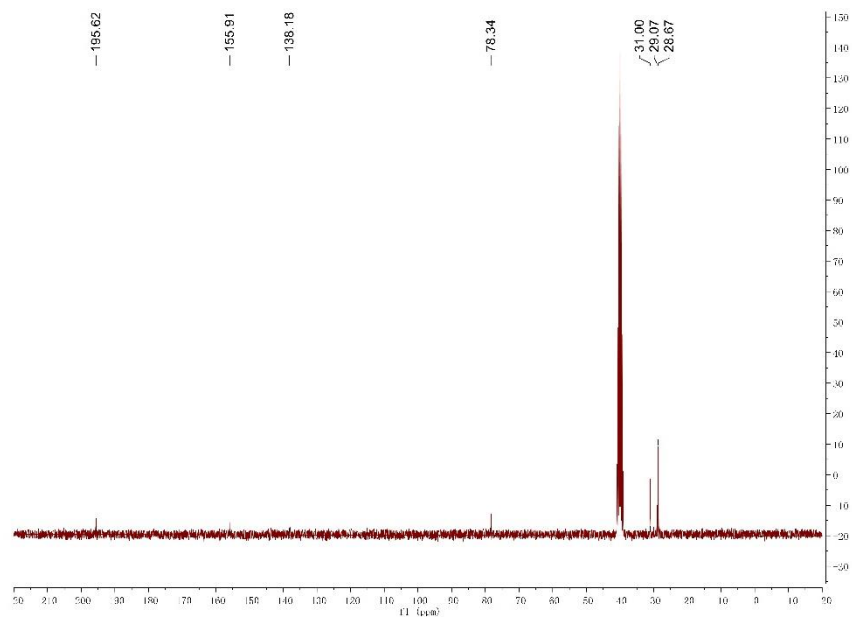

Figure S2.  $^{13}\text{C}$  NMR spectrum of compound 3 in DMSO.

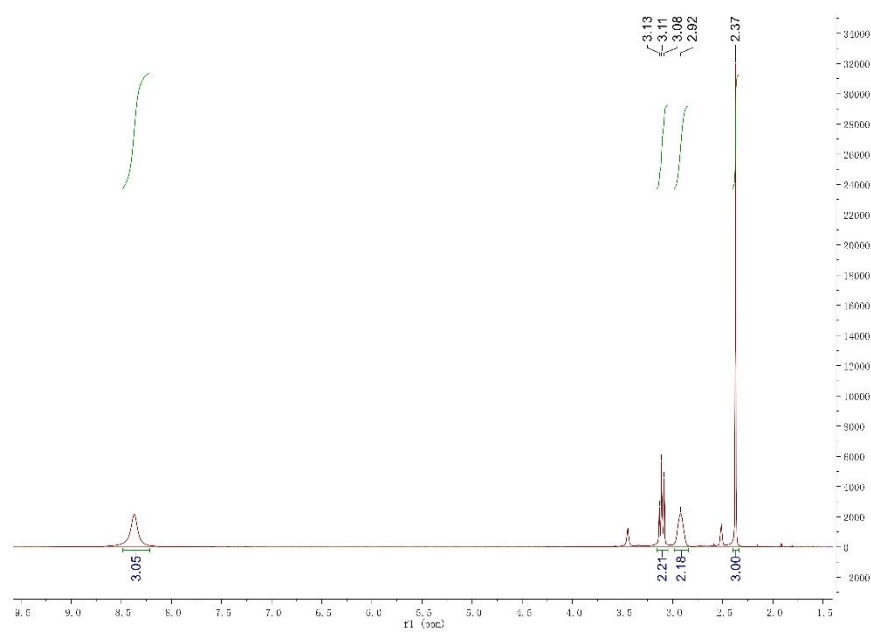

Figure S3.  $^1\text{H}$  NMR spectrum of compound 2 in DMSO.

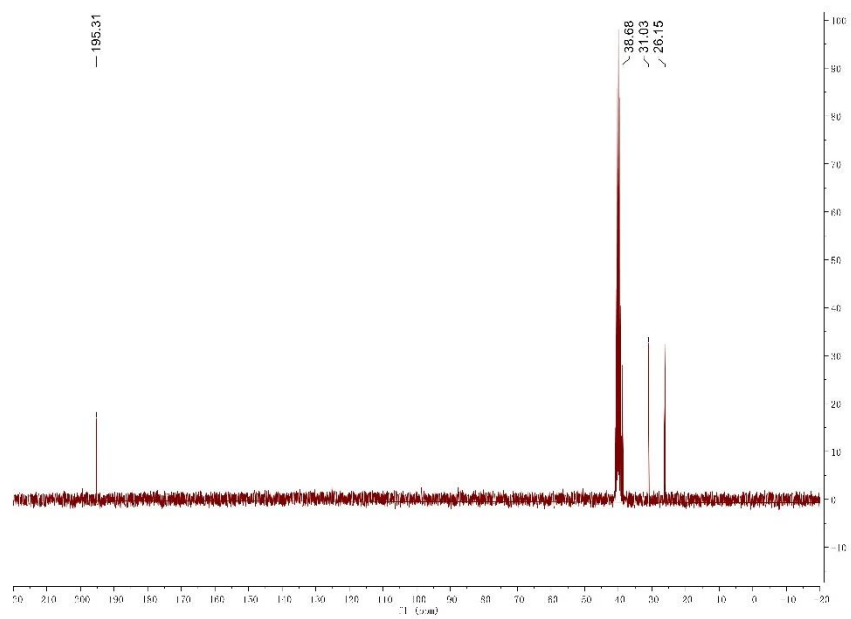

Figure S4.  $^{13}\text{C}$  NMR spectrum of compound 2 in DMSO.

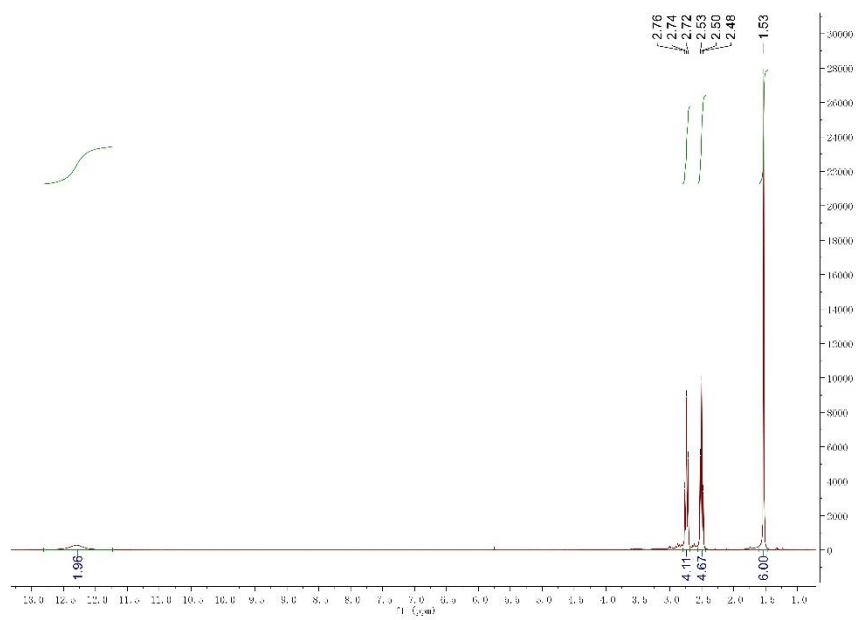

Figure S5.  $^1\text{H}$  NMR spectrum of TK in DMSO.

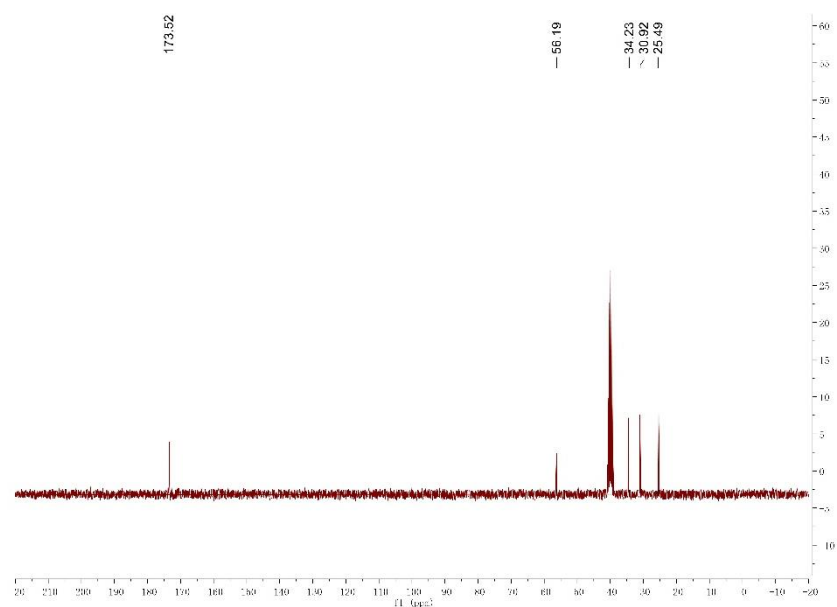

Figure S6. <sup>13</sup>C NMR spectrum of TK in DMSO.

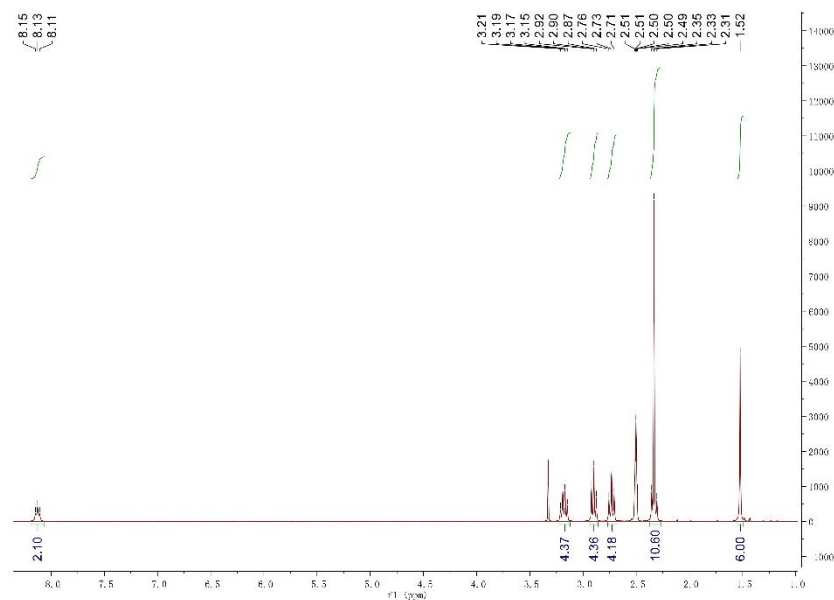

Figure S7. <sup>1</sup>H NMR spectrum of M1 in DMSO.

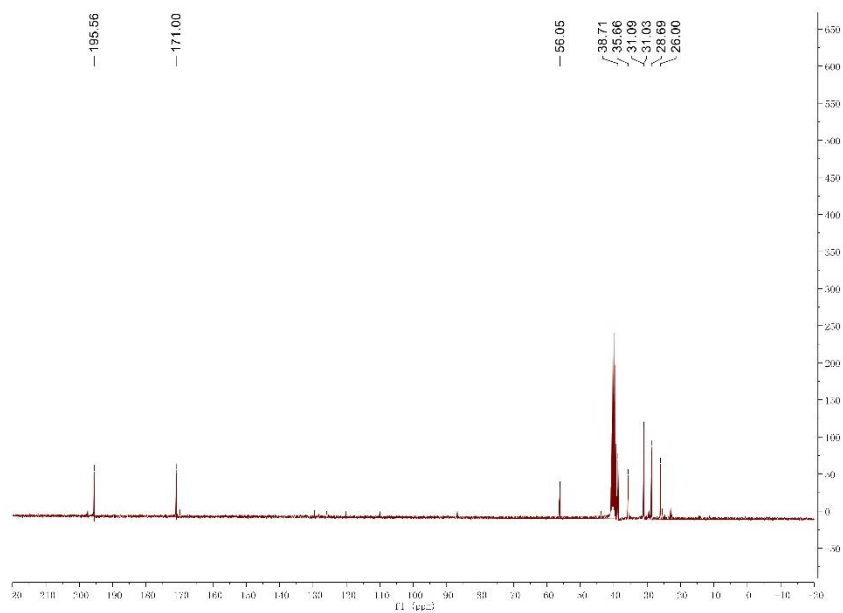

Figure S8. <sup>13</sup>C NMR spectrum of M1 in DMSO.

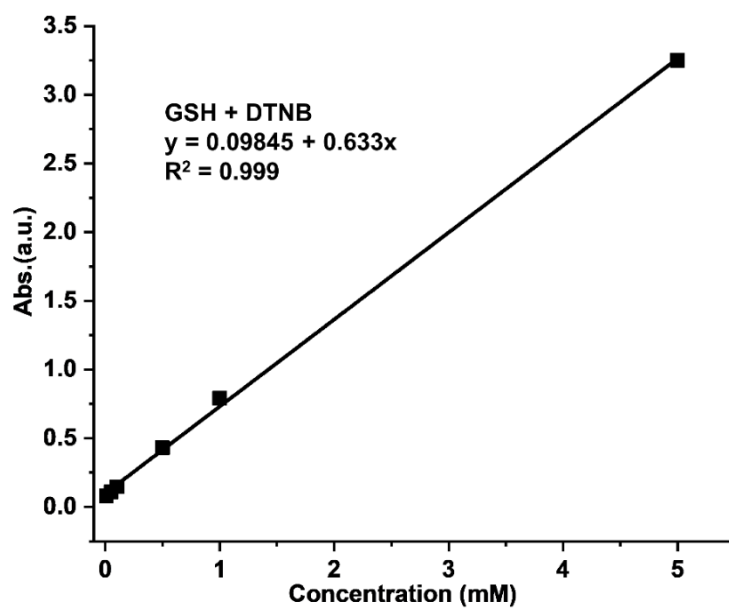

Figure S9. Standard curve between concentrations of glutathione and absorbance at 412 nm.

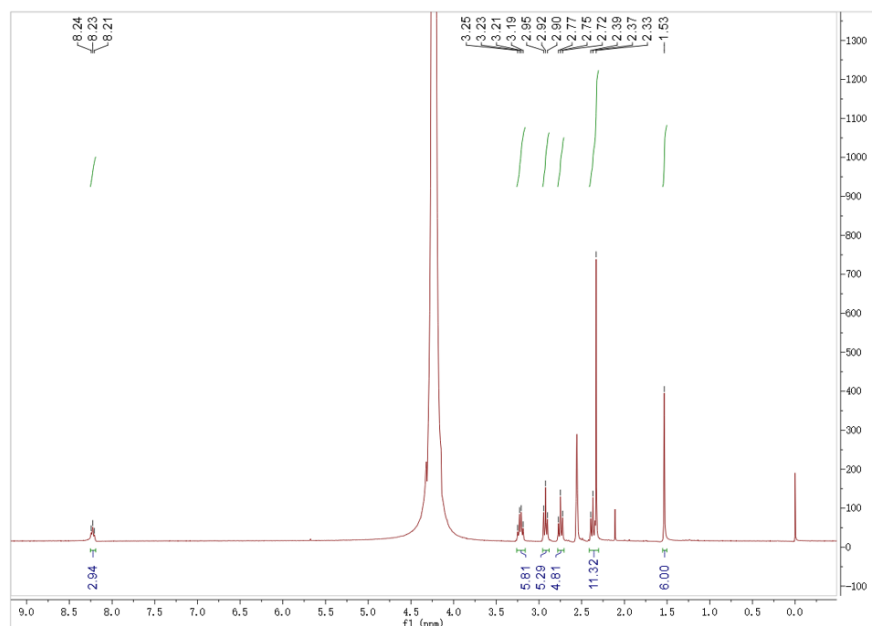

Figure S10.  $^1\text{H}$  NMR spectrum of M1 with HCl in DMSO.

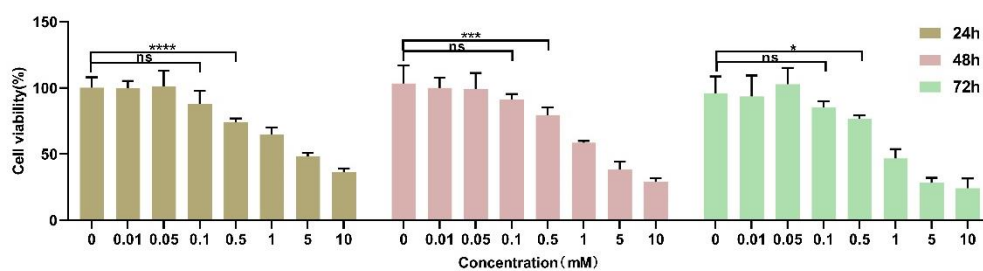

Figure S11. Cytotoxicity assays of M1 with HIEC-6 cells.

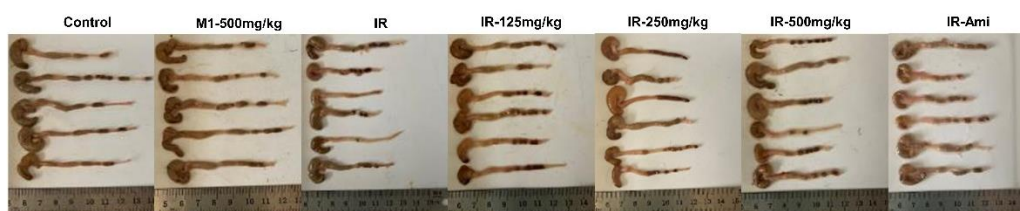

Figure S12. Colon tissues of mice in control, IR, M1-500 mg/kg, IR + 125 mg/kg, IR + 250 mg/kg, IR + 500 mg/kg and IR + Ami groups 3 days after 13 Gy ABI,  $n = 6$  per group.
